# Supplementary material for: Drosha Regulates Gene Expression Independently of RNA Cleavage Function
Source: PubMed Central journal article supplement — Cell Rep. 2013 Dec 19;5(6):1499–510. doi: 10.1016/j.celrep.2013.11.032 (PMC3898267; doi:10.1016/j.celrep.2013.11.032), 2013-12-19
Supplement: mmc1.pdf [file mmc1.pdf]

## **Drosha regulates gene expression independently of RNA-cleavage function**

Natalia Gromak<sup>1\*</sup>, Martin Dienstbier<sup>1</sup>, Sara Macias<sup>2</sup>, Mireya Plass<sup>3,5</sup>, Eduardo Eyra<sup>3,4</sup> Javier F. Caceres<sup>2</sup> and Nicholas J. Proudfoot<sup>1\*</sup>

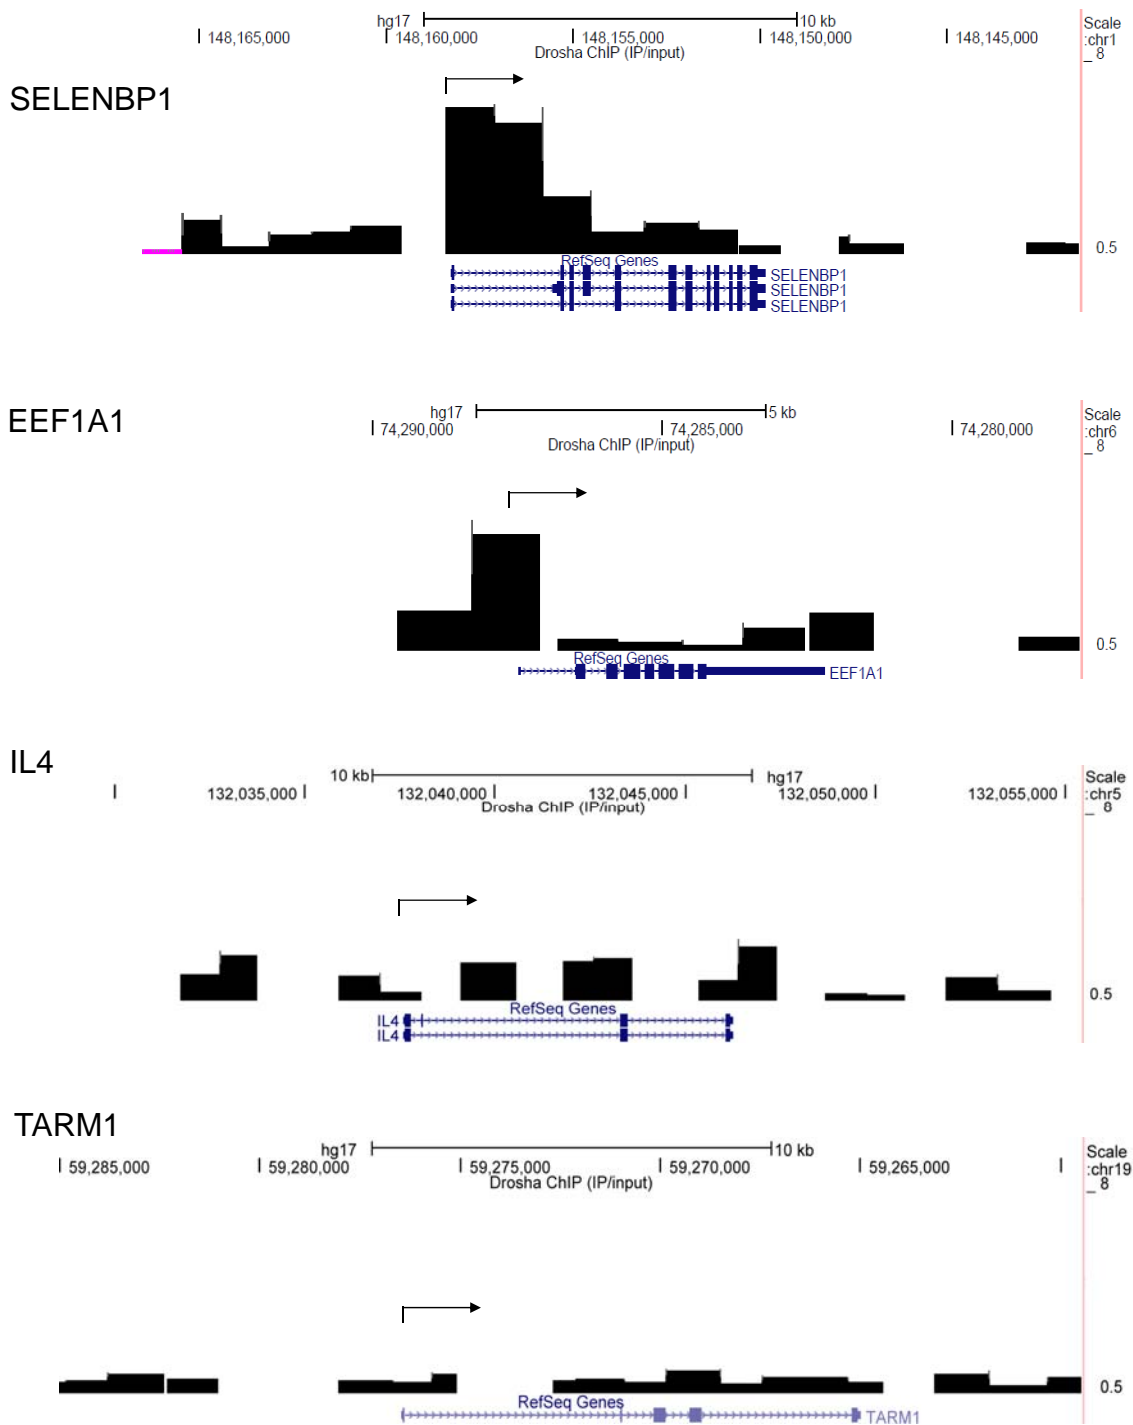

**Figure S1, related to Figure 1A.**

**Drosha ChIP-on-chip profile across SELENBP1, EEF1A, IL4 and TARM1 genes.**

Drosha ChIP-on-chip profile across SELENBP1 and EEF1A1 genes showing the signal enrichment over the TSSs. No enrichment of Drosha signal was observed over IL4 and TARM1 genes, not expressed in HeLa cells. Arrow above Chip-on-chip profile indicates the position of TSS for each gene.

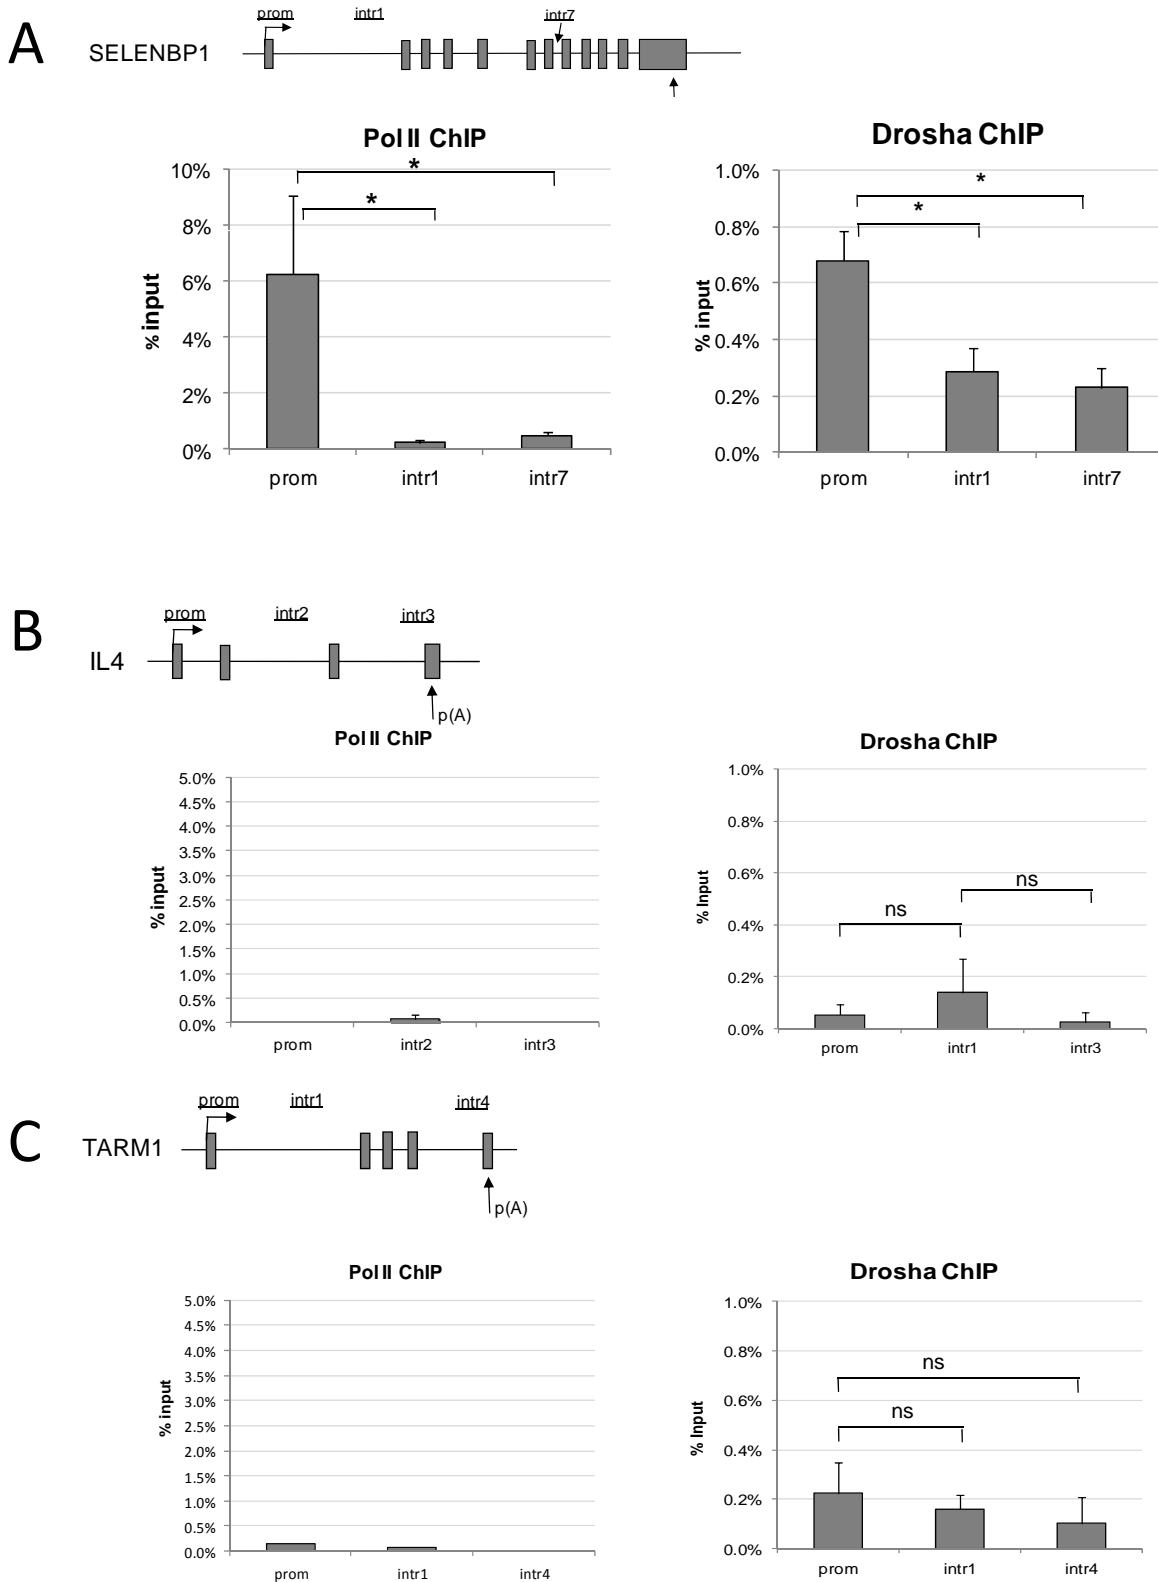

**Figure S2, related to Figure 1A.**

**Drosha and Pol II profiles of SELEBP1, IL4 and TARM1 genes**

**A)** Pol II (left panel) and Drosha (right panel) ChIP analysis on SELENBP1 gene. Bars represent average values from at least three independent experiments +/- SD. Position of PCR amplicons are shown above the gene diagram.

**B, C)** Pol II (left panels) and Drosha (right panels) ChIP profiles over IL4 (**B**) and TARM1 (**C**) genes, not expressed in HeLa cells. Amplicon positions are shown above gene diagram.

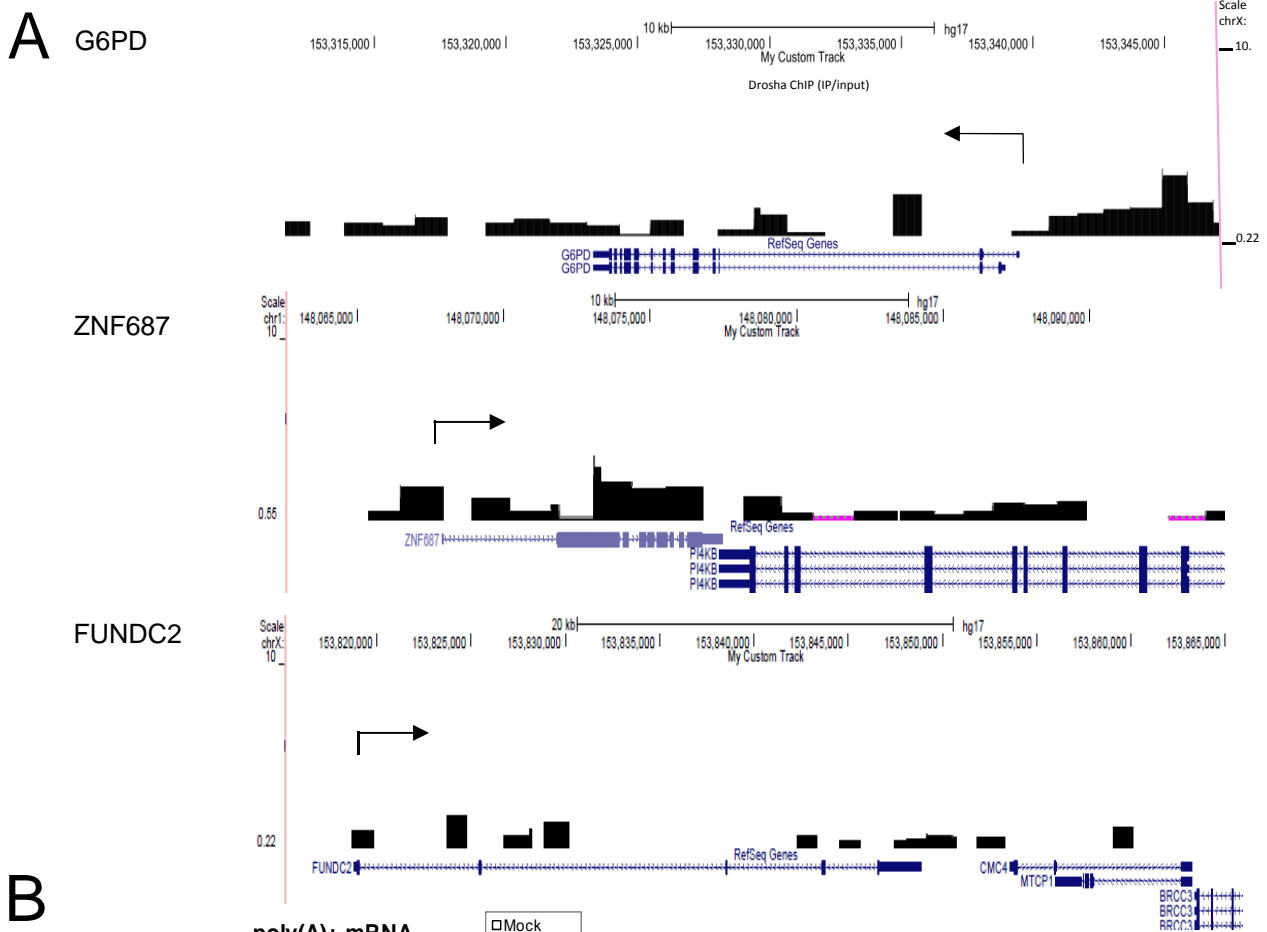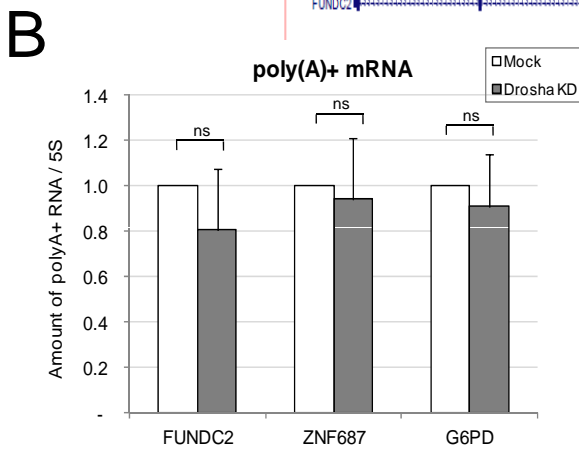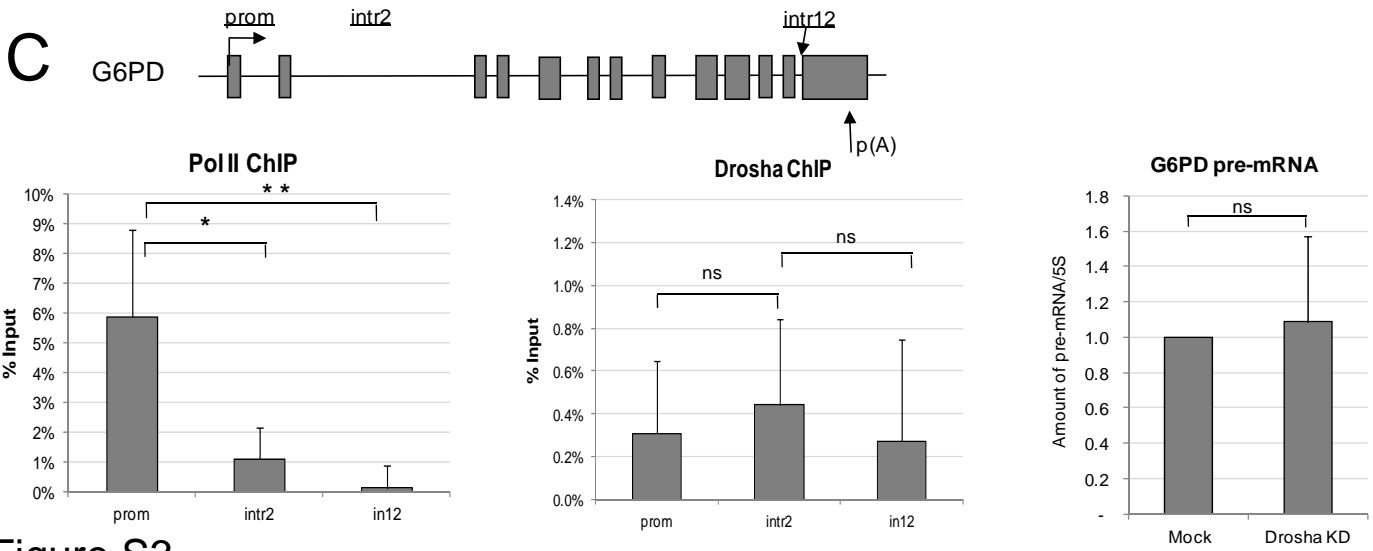

Figure S3

**Figure S3, related to Figure 1A.**

**Analysis of G6PD, ZNF687 and FUNDC2 genes**

- A) Drosha ChIP-on-chip profile across G6PD, ZNF687 and FUNDC2 genes. Arrow above Chip-on-chip profile indicates the position of TSS.
- B) The levels of poly(A)<sup>+</sup> mRNA for FUNDC2, ZNF687 and G6PD genes detected in mock-treated and Drosha knocked-down HeLa cells. RNA levels were measured using qRT-PCR and normalised to 5S rRNA. RNA levels in mock-treated cells were taken as 1.
- C) Top panel: Diagram of G6PD gene with positions of PCR amplicons used for RT-qPCR. Pol II (left panel) and Drosha (middle panel) ChIP analysis on G6PD gene. Position of PCR amplicons are shown above the gene diagram. Right panel: The levels of pre-mRNA G6PD transcripts detected in mock-treated and Drosha knocked-down HeLa cells. RNA levels were measured using qRT-PCR and normalised to 5S rRNA. RNA levels in mock-treated cells were taken as 1.
- Bars represent average values from at least three independent experiments +/- SD.

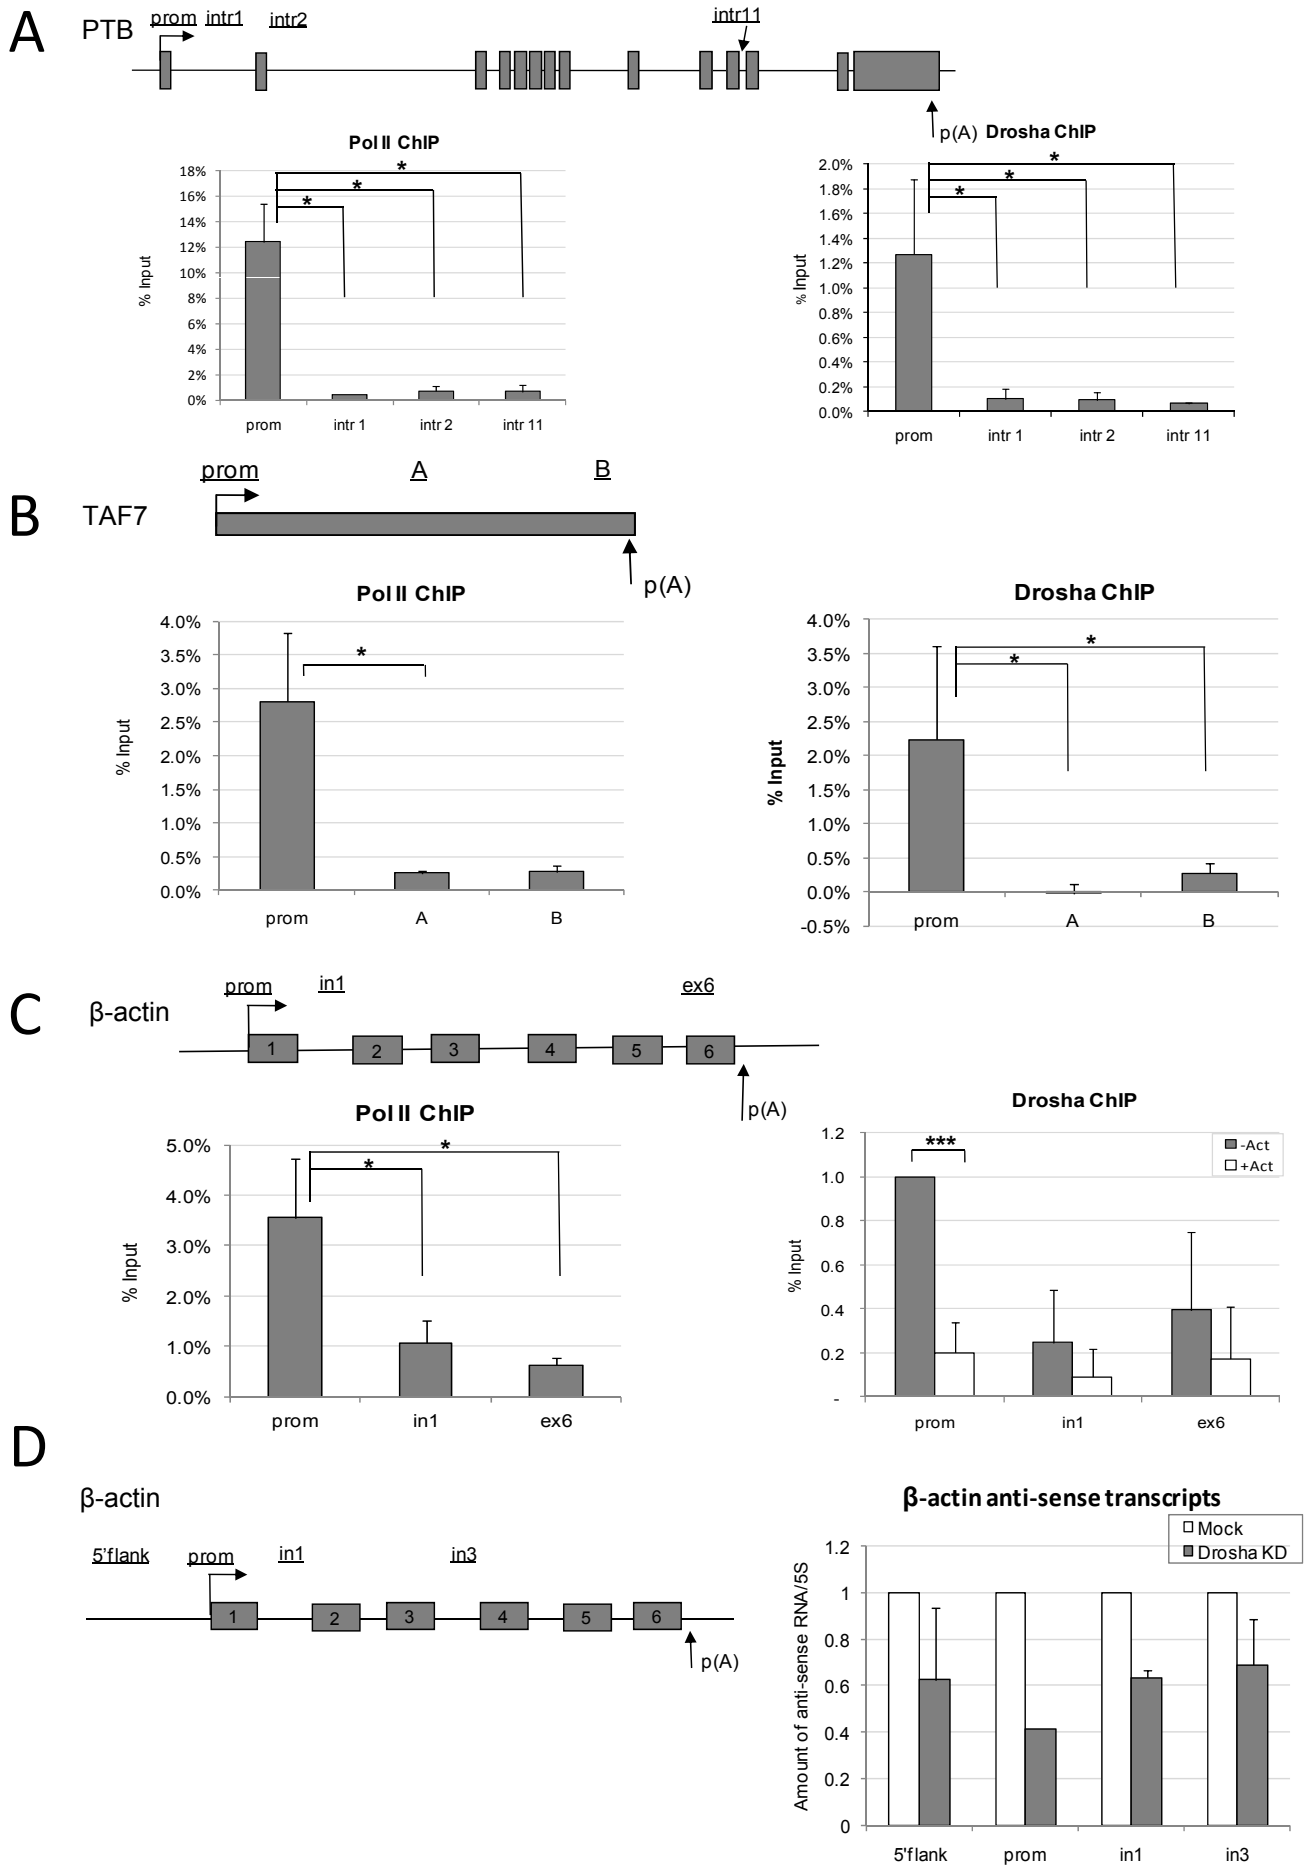

Figure S4

**Figure S4, related to Figure 1E.**

**Drosha binds human genes in a transcription-dependent manner**

**A,B,C) Drosha binds 5' ends of human PTB, TAF7 and  $\beta$ -actin genes.** Chromatin-immuno-precipitation (ChIP) experiments in HeLa cells with Pol II (left panel) and Drosha (right panel) antibodies on PTB (**A**), TAF7 (**B**) and  $\beta$ -actin (**C**) genes.

**C) Right panel:** Drosha ChIP experiments across  $\beta$ -actin gene were carried out in mock-treated HeLa cells (grey bars) or cells, treated with 5 $\mu$ g/ml of Actinomycin D for 6 hours (white bars). Primers used for ChIP analysis are shown above the gene diagrams. Bars represent the average values from at least three independent experiments +/- SD.

**D) Level of  $\beta$ -actin anti-sense transcripts detected in Drosha-depleted HeLa cells.**

**Left panel:** Diagram of  $\beta$ -actin gene with positions of PCR amplicons used for RT-qPCR.

**Right panel:** The levels of anti-sense transcripts detected over the 5' gene region of endogenous  $\beta$ -actin gene in mock-treated (white bars) and Drosha knocked-down (grey bars) HeLa cells. RNA levels were measured using qRT-PCR and normalised to 5S rRNA. RNA levels in mock-treated cells were taken as 1. Bars represent average values from at least three independent experiments +/- SD.

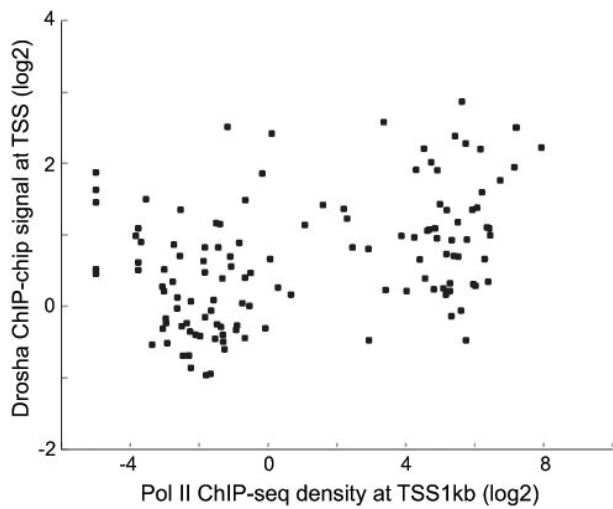

**Figure S5, related to Figure 1A.**

**Drosha enrichment at the TSS correlates with Pol II density.**

Drosha signal for each gene is shown as average  $\log_2(\text{IP}/\text{input})$  for chip probes overlapping the TSS (extended 250bp on both sides). Average Pol II density was calculated in 1kb region around the TSS using data from HeLa Pol II ChIP-seq analysis from ENCODE/Stanford/Yale/USC/Harvard Transcription Factor Binding Sites dataset (track downloaded from the UCSC depository:

<http://hgdownload.cse.ucsc.edu/goldenPath/hg19/encodeDCC/wgEncodeSydhTfbs/wgEncodeSydhTfbsHelas3Pol2StdSig.bigWig>). Only refseq transcripts covered by at least one probe over the TSS and the gene body in Drosha array are shown. There is weak (Pearson  $R=0.41$ ), but significant ( $p=1e-6$ ) positive correlation between the Drosha probe signal at TSS and PolII ChIP density.



## DGCR8 CLIP

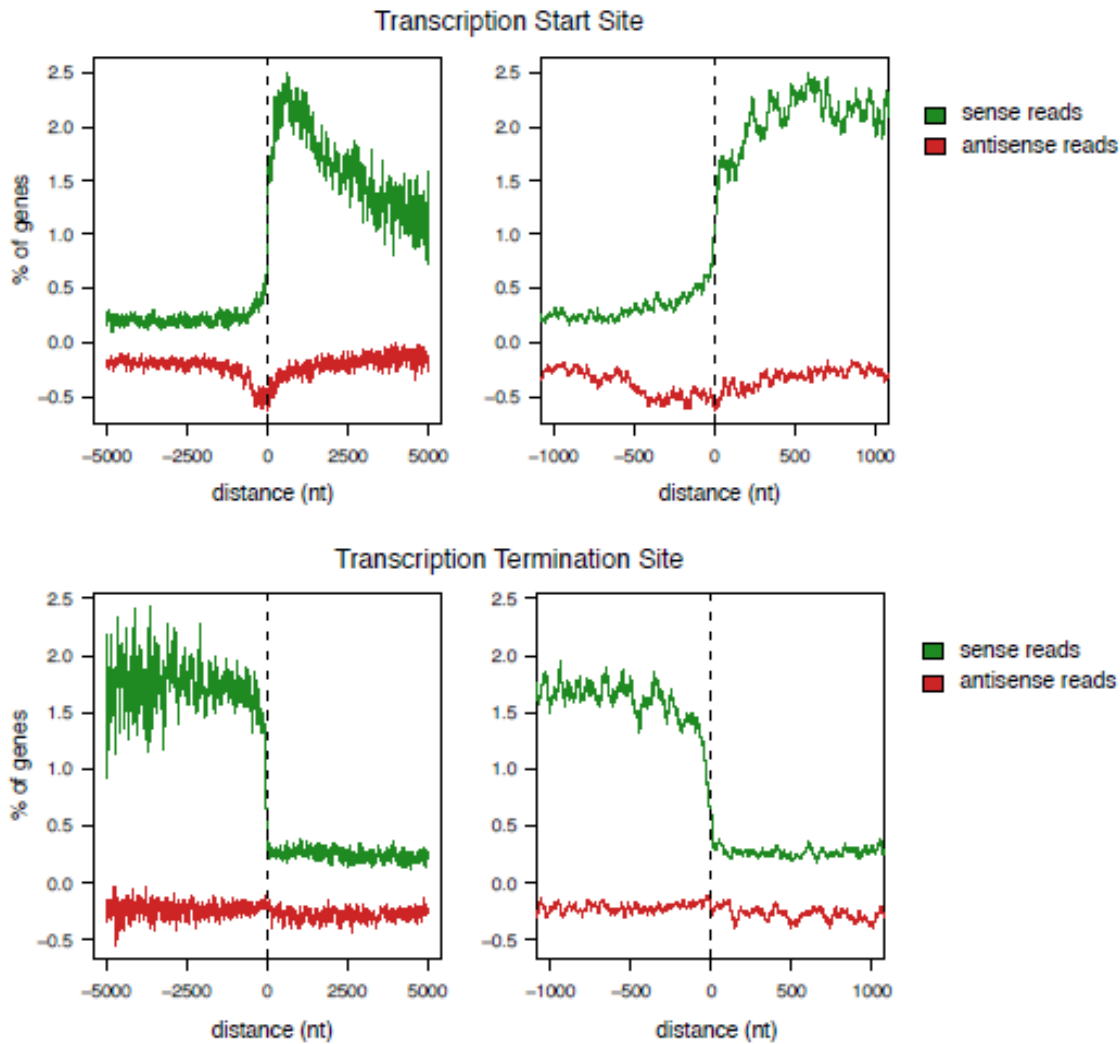

Figure S6, related to Figure 2B.

### DGCR8 HITS-CLIP.

Distribution of significant sense (green) and anti-sense (red) DGCR8 CLIP reads mapping around transcription start sites (TSS; top panels) and transcription termination regions (TTS; bottom panels) of protein coding genes using mRNA transcripts (cDNA) rather than pre-mRNA (Fig. 2B), as determined by R software. The Y axis shows the number of genes detected as a percentage, whereas the X axis represents the location in relation to the position of TSS and TTS.

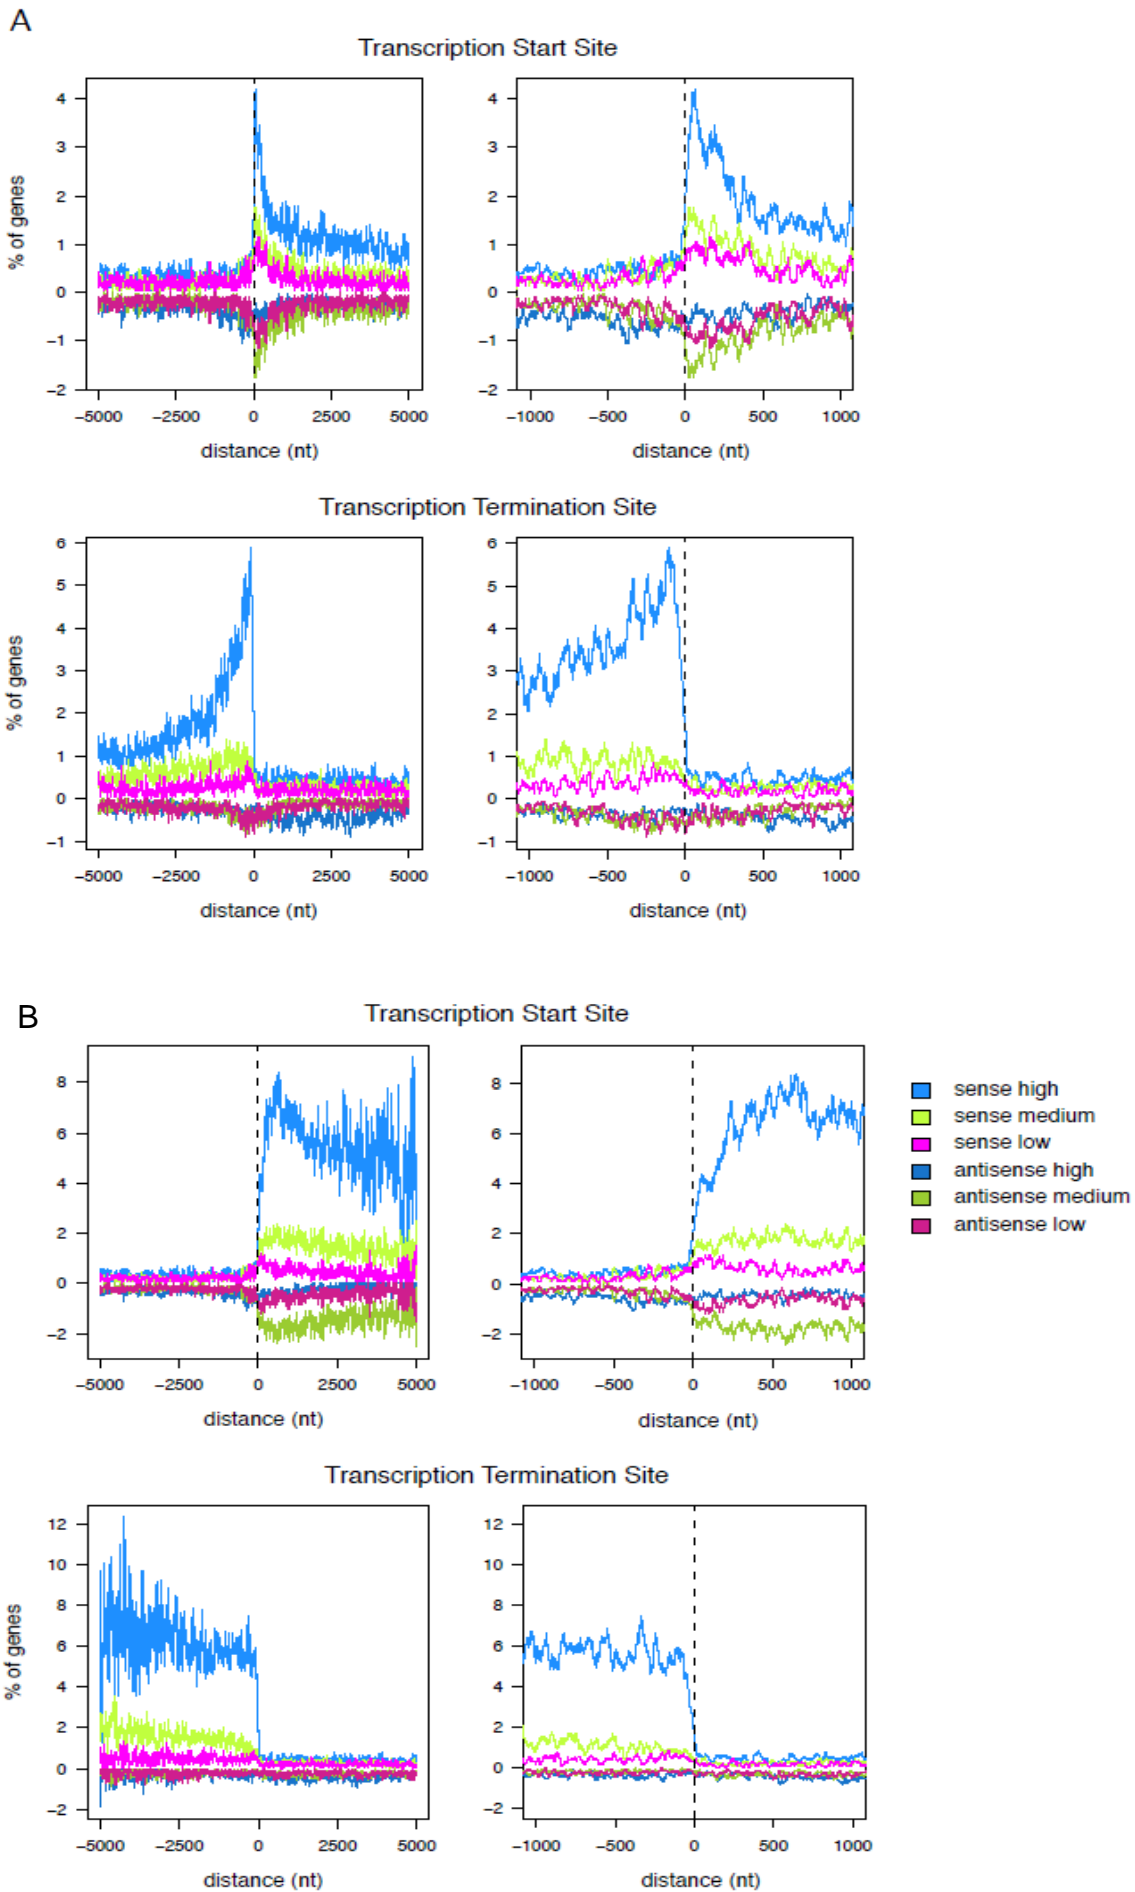

Figure S7

**Figure S7, related to Figure 2B.**

Distribution of significant reads mapping around transcription start sites (TSS; top panels) and transcription termination regions (TTS; bottom panels) of protein coding genes on the genomic DNA (A) and cDNA (B) for genes with high, medium or low expression levels both in sense (blue, green and magenta) and in antisense (dark blue, dark green and dark magenta) orientation. The Y axis shows the number of genes detected as a percentage, whereas the X axis represents the location in relation to the position of TSS and TTS. Number of genes analysed in each category: high expression level (2727); low expression level (2727); medium expression level (2726).

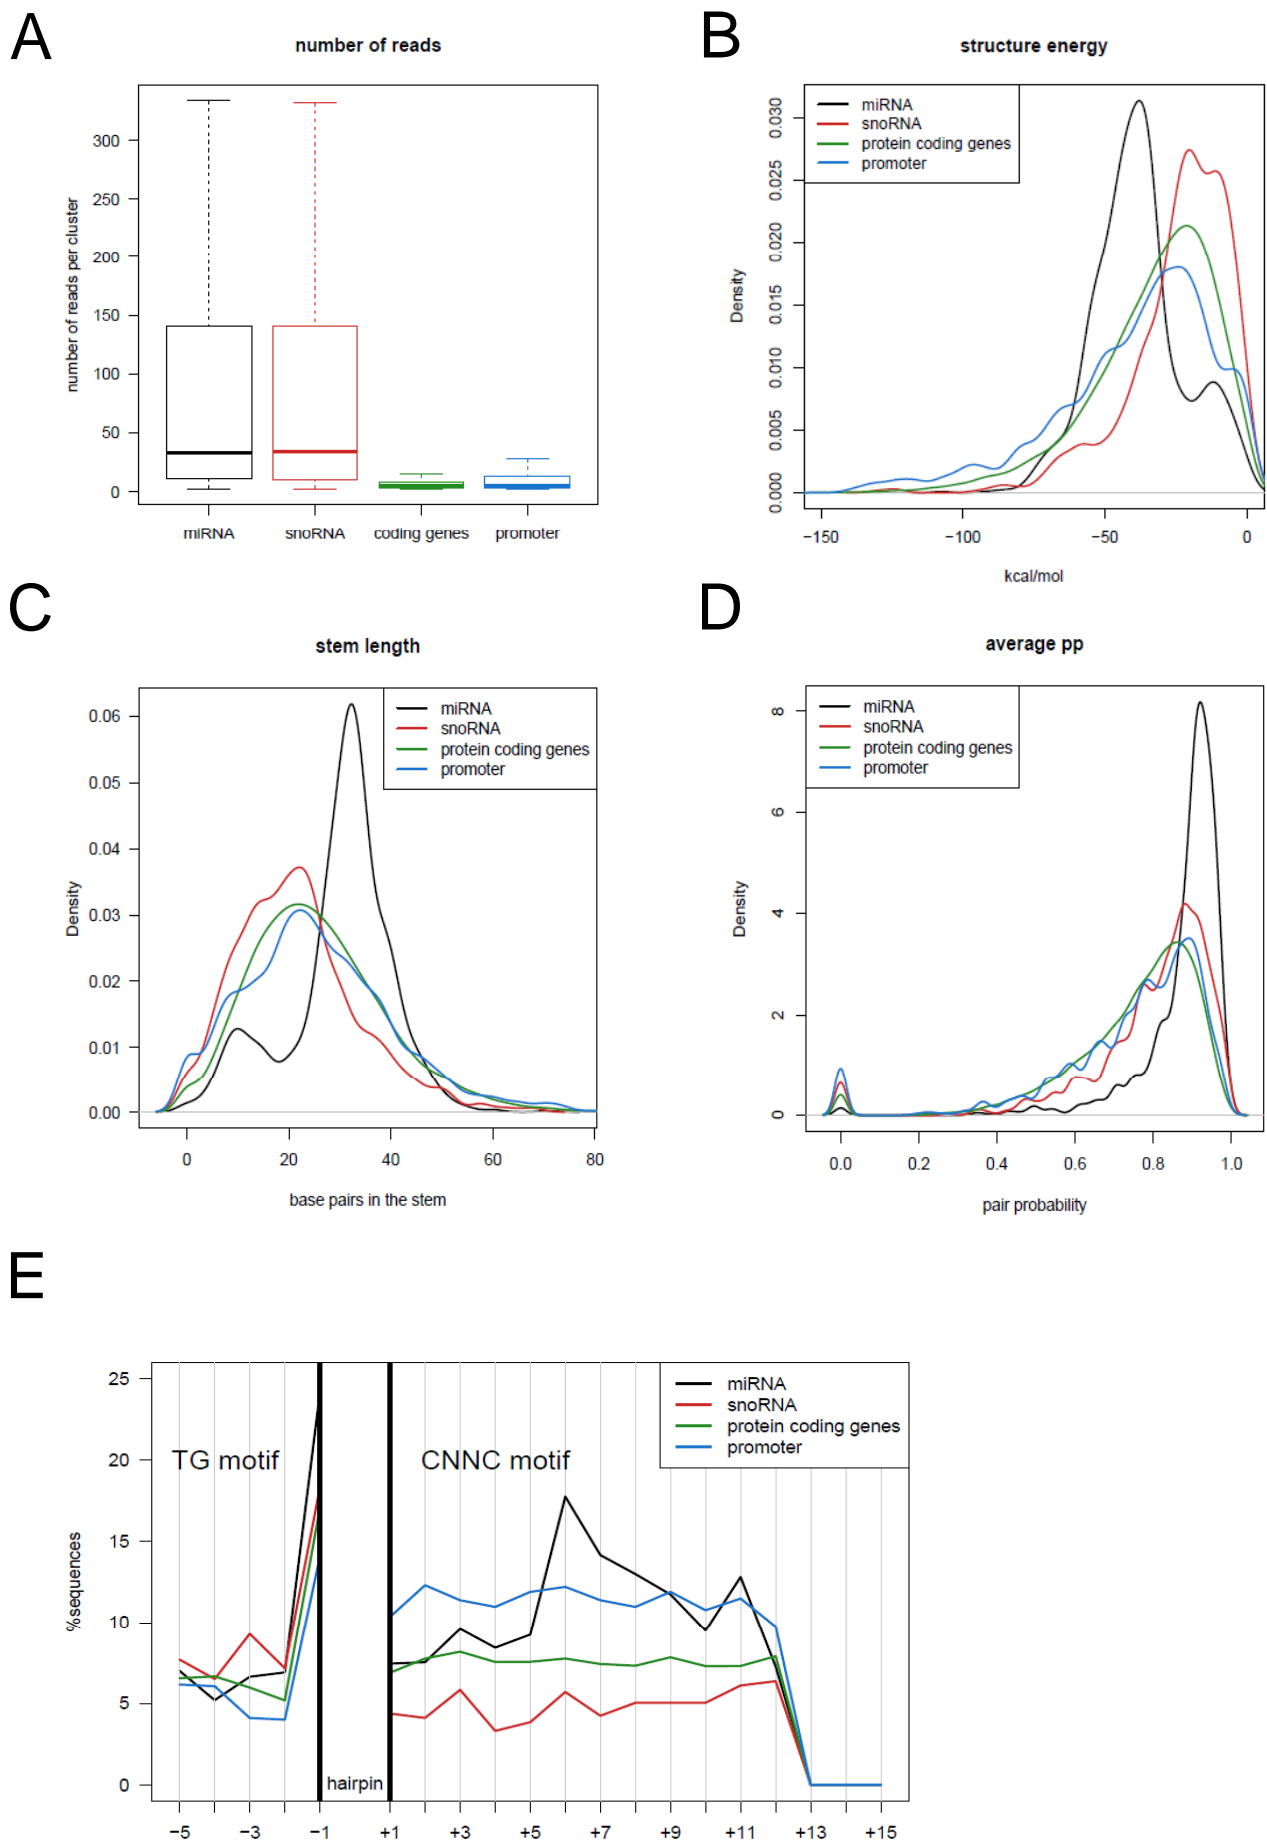

Figure S8

**Figure S8, related to Discussion section.**

**Bioinformatic analysis of the structures formed by Microprocessor targets**

**A.** Number of reads detected for each class of structures (promoters, snoRNA, miRNAs and coding genes) in DGCR8 CLIP experiments. Clusters in promoters have a significantly lower amount of reads than miRNAs and snoRNAs (Kolmogorov-Smirnov test  $p$ -value  $< 2.2e-16$  and  $9.691e-08$  respectively).

**B.** Secondary structure energy. The optimal secondary structures in promoters have a higher minimum free energy than miRNAs.

**C.** Stem length. Structures predicted in promoters are shorter than those in miRNAs, suggesting their potential less efficient structure recognition by the Microprocessor complex.

**D.** Pair probability. The pair probability gives a measure of structure stability by evaluating the probability of the predicted base pairs. Pair probability of 1 means that the nucleotides will always be basepairing with each other, whereas a pair probability of 0.5 means that they will only be basepaired in 50% of the cases. Structures predicted in promoters have a lower pair probability than miRNA regions, pointing towards their less efficient recognition by the Microprocessor.

**E.** Presence of motifs important for the processing of the stem. These motifs are TG dinucleotide at the base of the stem at positions -14 and -13 and CNNC motif downstream of the stem at position +6-+8, relative to the cleavage site, as described in (Auyeung et al., 2013). Since the position of cleavage site is not defined in such structures, the presence of the motifs was analysed in relation to the base of the stem predicted. 20% of the structures predicted to overlap with pri-miRNAs had a TG motif at the base of the stem and a high CNNC bias at positions +6-+8 after the stem. In the case of promoter structures, TG bias upstream of the stems is the lowest of all the groups analyzed, and that there is no positional bias of the CNNC motif after the stem.

## **Supplemental Experimental Procedures**

### **RNA analysis**

OligodT primer was used for reverse transcription to detect the polyA<sup>+</sup> RNA. For the detection of nascent RNA, reverse PCR primer was used for the reverse transcription reaction. The qPCR primers for amplification of pre-mRNAs were the following: PTB intr2F/R, GAPDH intr1F/R, TAF7 BF/R, SELENBP1 intr1F/R, IL4 intr 1F/R, TARM1 intr4F/spliced R. qPCR primers for the amplification of polyA<sup>+</sup> RNAs were the following:  $\beta$ -actin ex5F/ex6R, PTB ex13F/ex14R, GAPDH F/R3,  $\gamma$ -actin spliced F/R, TAF7 BF/R, SELENBP1 ex7F/ex8R, Drosha F/R. For quantitative real-time PCR, 2  $\mu$ l of cDNA was analyzed using a Rotorgene 3000 real-time PCR machine (Corbett Research) in the presence of Quantitec SYBR green (Qiagen). Cycling parameters were 95°C for 15 min, followed by 45 cycles of 95°C for 15 s, 58°C for 20 s, and 72°C for 20 s. Fluorescence intensities were plotted against the number of cycles by using an algorithm provided by the manufacturer. Primer sequences are shown in Supplemental Table 1.

### **Drosha ChIP-on-chip analysis**

Four hundred and fifty nanograms of purified ChIP DNA was labelled with Cy3-2'-deoxycytosine 5'-triphosphate (dCTP, for IP DNA; Amersham PA53021) or Cy5-dCTP (for input DNA; Amersham PA55021) using BioPrime DNA labelling System (18094-011, Invitrogen) according to manufactures instructions. Labelled DNA was purified through Amersham G50 columns. Cy3-labelled IP DNA and Cy5-labelled input DNA were combined, precipitated in ethanol with human Cot-1 DNA (Invitrogen 15279-011) and yeast tRNA (Invitrogen 15401-011) and resuspended in hybridisation buffer (50% [v/v] formamide, 2x standard saline citrate (SSC), 10 mM Tris pH 7.4, 5% [w/v] dextran sulphate, 0.1% [v/v] Tween 20). Hybridisation solution containing the labelled DNAs was hybridised to the human ENCODE 5.1.1 array (Sanger Centre, Cambridge) in a HS 400 Pro Hybridisation Station (Tecan Austria, Groding/Salzburg, Austria) for 45 hours. ENCODE array is represented by 44 separate tiled regions covering 30 Mb and ~481 human genes (~1% coverage). Median length of region covered by each probeset is 1143 bp. The arrays were then scanned in a Scan Array Gx Plus scanner (Perkin Elmer, Shelton, CT), faulty spots excluded and the spot intensities were quantified using Scan Array Express Version 3.0 (Perkin Elmer) with background subtraction. The background-corrected ChIP signal divided by the background-corrected input signal (both globally normalised using Lowess normalisation) were used for the analysis. The data were then plotted and visualised on a UCSC genome browser (version NCBI35/hg17).

For the calculation of metagene profile and average statistics for different annotated regions (Figure 1E i, ii), NCBI RNA reference sequence (RefSeq) annotation collection (Pruitt et al., 2005) was downloaded from UCSC genome browser track (NCBI35/hg17). Annotated transcript start and end sites were extended 250 bp on both sides before calculating probe overlaps. Gene body was defined as a region between 1.5 kb downstream of the transcript start and the transcript end. Metagene profiles of Drosha binding around annotated TSS and TTS were generated by calculating average probe signal ( $\log_2(\text{IP}/\text{input})$ ) for all probes covering corresponding position in annotated RefSeq genes. Only genes longer than 3 kb were used to generate these profiles. Each position represents an average signal of at least 120 probes.

### **DGCR8 HITS-CLIP analyses**

To investigate whether the binding of DGCR8 correlates with gene expression, we divided protein coding genes from Ensembl54 into three groups according to their expression level: high, medium and low. First, we mapped mRNA-seq data from HEK 293 cells (GSM 936076; (Baltz et al., 2012) on the human genome (hg18) using BWA (Li and Durbin, 2009). Next, we estimated the expression level of genes as the number of reads mapping to the longest mRNA divided by the mRNA length. Only transcripts with at least 5

reads per 1000 nt of mRNA were kept. We ordered the remaining genes according to their expression and selected the low expressed genes (bottom 20%; quantile 0.2), the medium expressed genes (quantile 0.4-0.6) and the highly expressed genes (top 20%; quantile 0.8). To build the profiles, only reads belonging to significant clusters FDR < 0.01 (Macias et al., 2012) were considered.

**Table 5, related to Experimental Procedures. Sequences of PCR primers**

| Name                | Sequence (5' → 3')                |
|---------------------|-----------------------------------|
| <b>PTB</b>          |                                   |
| prom (F)            | GTC TCC GCC ATT TTG TGA GT        |
| prom (R)            | ATG GCA CAC AGA GCA GAC C         |
| intr1 (F)           | GAG AGG CTG GAG ATG TTT CG        |
| intr1 (R)           | GCC TCT TCT GAC ACC ACA GA        |
| intr2 (F)           | GCC CCT TAG GAA TGG AAA AG        |
| intr2 (R)           | GCC GTT GGT ACA AAG GTA GG        |
| intr11(F)           | CAG TGG CCG ATA AAG CAA AC        |
| intr11(R)           | CTG CAC TAG GGC GTT CTC CTT C     |
| PTB ex13 (F)        | GGC TCC AAG AAC TTC CAG AAC       |
| PTB ex14 (R)        | ATT GCT GGA AAA CAG GAC CTT       |
| <b>γ-actin</b>      |                                   |
| prom (F)            | GGA AAG ATC GCC ATA TAT GGA C     |
| prom (R)            | TCA CCG GCA GAG AAA CGC GAC       |
| intr1 (F)           | CCG CAG TGC AGA CTT CCG AG        |
| intr1 (R)           | CGG GCG CGT CTG TAA CAC GG        |
| ex5(F)              | GTG ACA CAG CAT CAC TAA GG        |
| ex5 (R)             | ACA GCA CCG TGT TGG CGT           |
| γ-actin spliced (F) | AAT CTT GCG GCA TCC ACG AG        |
| γ-actin spliced (R) | TCG TAC TCC TGC TTG CTA ATC C     |
| <b>GAPDH</b>        |                                   |
| prom (F)            | AGC TCA GGC CTC AAG ACC TTG GGC T |
| prom (R)            | GGC TGA CTG TCG AAC AGG AGC       |
| intr1 (F)           | CCA CTA GGC GCT CAC TGT TC        |
| intr1 (R)           | TCG TAG ACG CGG TTC GG            |
| intr2a (F)          | TGC GGG GTC ACG TGT CGC AG        |
| intr2a (R)          | AAC GGC TGC CCA TTC ATT TC        |
| intr2b (F)          | GGT CAA CGC TAG GCT GGC AG        |
| intr2b (R)          | GTG GCA TGG TGC CAA GCC GG        |
| ex8(F)              | GGT GGT GAA GCA GGC GTC GGA GGG   |
| ex8 (R)             | GAG CCA GTC TCT GGC CCC AGC CAC   |
| GAPDH spliced (F)   | ACA TCA AGA AGG TGG TGA AG        |
| GAPDH spliced (R3)  | GGG TCT TAC TCC TTG GAG GC        |
| <b>TAF7</b>         |                                   |

|                         |                                 |
|-------------------------|---------------------------------|
| prom (F)                | CTT CCG TTT TTG CTG GGT AG      |
| prom (R)                | GAG CGT CTC CTT GTC GTT TC      |
| A (F)                   | AGA CCT GCC CTG TGT TAT GG      |
| A (R)                   | CTA GCA ACT GGC TCC TCC AC      |
| B (F)                   | TTG CAG GAT TAG CGG AAT GT      |
| B (R)                   | ACG TCA CAA AGC AGC AA          |
|                         |                                 |
| <b>β-actin</b>          |                                 |
| β-actin ex4 (F)         | TCGTGCGTGACATTAAGGAG            |
| β-actin ex4 (R)         | GTCAGGCAGCTCGTAGCTCT            |
| β-actin ex5 (F) spliced | GGA CAT CCG CAA AGA CCT GTA     |
| β-actin ex6 (R) spliced | CTC CAA CCG ACT GCT GTC ACC     |
| prom (F)                | GAG GGG AGA GGG GGT AAA         |
| prom (R)                | AGC CAT AAA AGG CAA CTT TCG     |
| In1 (F)                 | CGG GGT CTT TGT CTG AGC         |
| In1 (R)                 | CAG TTA GCG CCC AAA GGA C       |
| Ex 6 (F)                | GGA GCT GTC ACA TCC AGG GTC     |
| Ex6 (R)                 | TGC TGA TCC ACA TCT GCT GG      |
|                         |                                 |
| <b>IL4</b>              |                                 |
| prom (F)                | TAT CTT TGT CAG CAT TGC ATC     |
| prom(R)                 | ACA AAG TTG CCG GCA CAT GCT     |
| Intr1 (F)               | TGA AGG GTT TCT TGG GTG GA      |
| Intr1(R)                | GAG GTT CAT TAT GGA ACT CTC TG  |
| intr3(F)                | TTC AGG TGA CAA GTG CCA CAG     |
| IL4 spliced (R)         | CTG GTT GGC TTC CTT CAC AG      |
| IL4 spliced (F)         | TCC TGA AAC GGC TCG ACA G       |
|                         |                                 |
|                         |                                 |
| <b>TARM1</b>            |                                 |
| prom(F)                 | TGT TAC TGC CCA CAC TCT GG      |
| prom(R)                 | GGG ATC ATG ATG GCT CCT TAG     |
| intr1(F)                | GCT CAC GCC TGT AAT CCC AG      |
| intr1(R)                | TAG TAG AAA TGG GGT TTC ACC     |
| intr4 (F)               | CAT TAA GTG GGT GAT GAT AGT CAG |
| TARM1 spliced (F)       | CAG CTT GAG ATA TTG GTG ACA G   |
| TARM1 spliced (F)       | GTC GTA CGA AGT TAC CCA GG      |
|                         |                                 |
| <b>SELENBP1</b>         |                                 |
| prom(F)                 | CAG CTG GTT GTA TAA ATT CCC     |
| prom(R)                 | TTG CTG TGC TGG TGT CAG AG      |
| intr1 (F)               | CTG CAC CCT CGT GTT TAC TTC     |
| intr1(R)                | AGC TTG GGC AAA GTA CTG AAG     |
| intr7(F)                | TTC TGA TAG GCT GAC CTC TCT G   |
| Ex7 spliced (F)         | CCA TCC AGC GCT TCT ACA AG      |



|                        |                                                                               |
|------------------------|-------------------------------------------------------------------------------|
| Ex8 spliced (R)        | CAG CCA GCC CTT CAC TTT C                                                     |
|                        |                                                                               |
| <b>G6PD</b>            |                                                                               |
| prom (F)               | GGA AAC GGT CGT ACA CTT CG                                                    |
| prom (R)               | CAA ACA GCG TGT ATT TTA CCG                                                   |
| intr (F)               | AGG AGA GGT ACC AGG TGG AG                                                    |
| intr2(R)               | TGT CAA ACT CCT GAC CTC AG                                                    |
| intr12 (F)             | GCC TCC CAA GCC ATA CTA TG                                                    |
| intr12 (R)             | CCT GCC ATA AAT ATA GGG GAT G                                                 |
| G6PD spliced (F)       | AAC GTG AAG CTC CCT GAC G                                                     |
| G6PD spliced (R)       | CCT GCC ATA AAT ATA GGG GAT G                                                 |
|                        |                                                                               |
| ZNF687 F               | TAG AGA AAC ATG TCC AGG TCC                                                   |
| ZNF687 R               | TCA CTG CAA GAG TCA GAA GAC                                                   |
| FUNDC2 F               | CAA AGA GCA GCT GAA GAT CCG                                                   |
| FUNDC2 R               | CCC CCA GTT ACT AGA ACA TTC                                                   |
| 5S (F)                 | AGC GTC TAC GGC CAT ACC                                                       |
| 5S (R)                 | GGT ATT CCC AGG CGG TCT C                                                     |
| miR-330 (F)            | CCT TCT TCC AGG ATC GCG TC                                                    |
| miR-330 (R)            | GAG GTC TCC GAT GAA AAC GG                                                    |
| T7+ $\beta$ -actin (F) | TTA TCG AAA TTA ATA CGA CTC ACT ATA GGG AGAC<br>CTT CGC CCG TGC AGA GCC       |
| T7+ $\beta$ -actin (R) | CAG ATT GGG GAC AAA GGA AG                                                    |
| T7+miR-17-19 (F)       | TTA TCG AAA TTA ATA CGA CTC ACT ATA GGG AGAC<br>GAA TTC TTA AGG CAT AAA TAC G |
| miR-17-19 (R)          | GAT AAC TAA ACA CTA CCT GC                                                    |
| Drosha (F)             | GAG ACC TAG CCT AGT TTT CCTG                                                  |
| Drosha (R)             | AAT GCA CAT TCA CCA AAG TCAA                                                  |
| EGFP (F)               | GAC GTA AAC GGC CAC AAG TTC                                                   |
| EGFP (R)               | TGG TGC AGA TGA ACT TCA G                                                     |

### **Vcdrg'U3, related to Figure 1A. Drosha ChIP-on-chip analysis**

A) List of RefSeq genes with at least one probe covering both the TSS region and the gene body. Both number of probes and their average signal ( $\log_2(IP/input)$ ) are represented. Last column indicates the level of enrichment of the Drosha signal at TSS compared to the gene body.

B) Drosha ChIP-on-chip data.

List of NCBI35/hg17 genomic coordinates together with background-corrected Drosha-ChIP signal divided by the background-corrected input signal for each ENCODE 5.1.1 array probe (faulty spots excluded) .

### **Vcdrg'U4, related to Figure 2B, C. DGCR8 HITS-CLIP data.**

List of anti-sense clusters mapping to promoter regions of Ensembl genes. List of DGCR8 sense clusters is presented in (Macias et al., 2012). Promoters were defined as the 1000nt upstream of the TSS plus 200nt downstream of the TSS.

### **Supplemental references**

Auyeung, V.C., Ulitsky, I., McGeary, S.E., and Bartel, D.P. (2013). Beyond secondary structure: primary-sequence determinants license pri-miRNA hairpins for processing. *Cell* 152, 844-858.

Baltz, A.G., Munschauer, M., Schwanhausser, B., Vasile, A., Murakawa, Y., Schueler, M., Youngs, N., Penfold-Brown, D., Drew, K., Milek, M., *et al.* (2012). The mRNA-bound proteome and its global occupancy profile on protein-coding transcripts. *Mol Cell* 46, 674-690.

Li, H., and Durbin, R. (2009). Fast and accurate short read alignment with Burrows-Wheeler transform. *Bioinformatics* 25, 1754-1760.

Macias, S., Plass, M., Stajuda, A., Michlewski, G., Eyraes, E., and Cáceres, J.F. (2012). DGCR8 HITS-CLIP reveals novel functions for the Microprocessor. *Nat Struct Mol Biol* 19, 760-766.

Pruitt, K.D., Tatusova, T., and Maglott, D.R. (2005). NCBI Reference Sequence (RefSeq): a curated non-redundant sequence database of genomes, transcripts and proteins. *Nucleic Acids Res* 33, D501-504.
